# Supplementary material
Source: PubMed Central journal article supplement (PMC2756548)
Supplement: mmc1.pdf [file mmc1.pdf]

**Supplemental Data****AJHG, Volume 85****Familial Hemophagocytic Lymphohistiocytosis Type 5****(FHL-5) Is Caused by Mutations in Munc18-2****and Impaired Binding to Syntaxin 11**

Udo zur Stadt, Jan Rohr, Wenke Seifert, Florian Koch, Samantha Grieve, Julia Pagel, Julia Strauß, Brigitte Kasper, Gudrun Nürnberg, Christian Becker, Andrea Maul-Pavicic, Karin Beutel, Gritta Janka, Gillian Griffiths, Stephan Ehl, and Hans Christian Hennies

**Figure S1. Effects of the Splice Site Mutation c.1247-1G>C in Patient 0879**

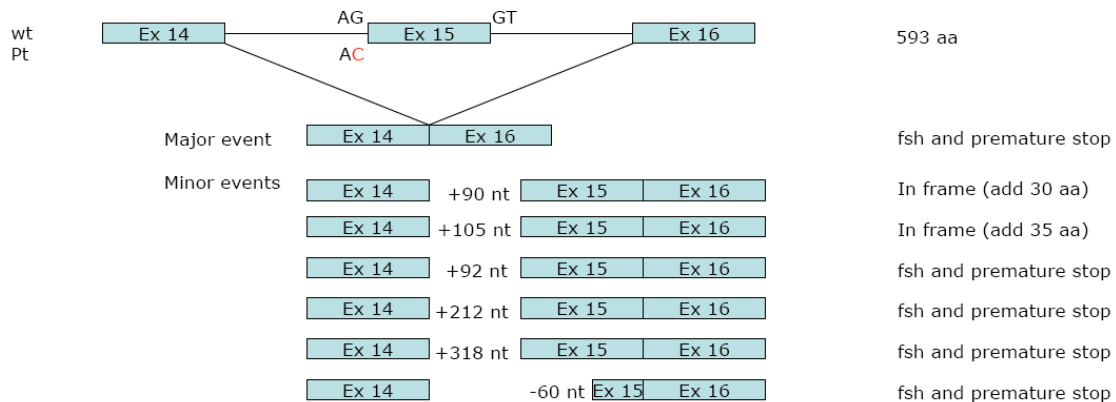

Total RNA was analysed by reverse transcription of a fragment including exons 14 to 16. PCR analysis of the cDNA showed a variety of products. Fragments were cloned and single clones were sequenced. A complete loss of exon 15 was found in about 95% of the clones, resulting in a frameshift and a stop codon after 126 new codons and a potential protein of 541 residues. Two minor in-frame products were identified, all further products showed a frameshift (fsh) and an early stop codon, probably resulting in instable mRNA.

Figure S2. Cellular Localization of STXBP2 and Syntaxin 11

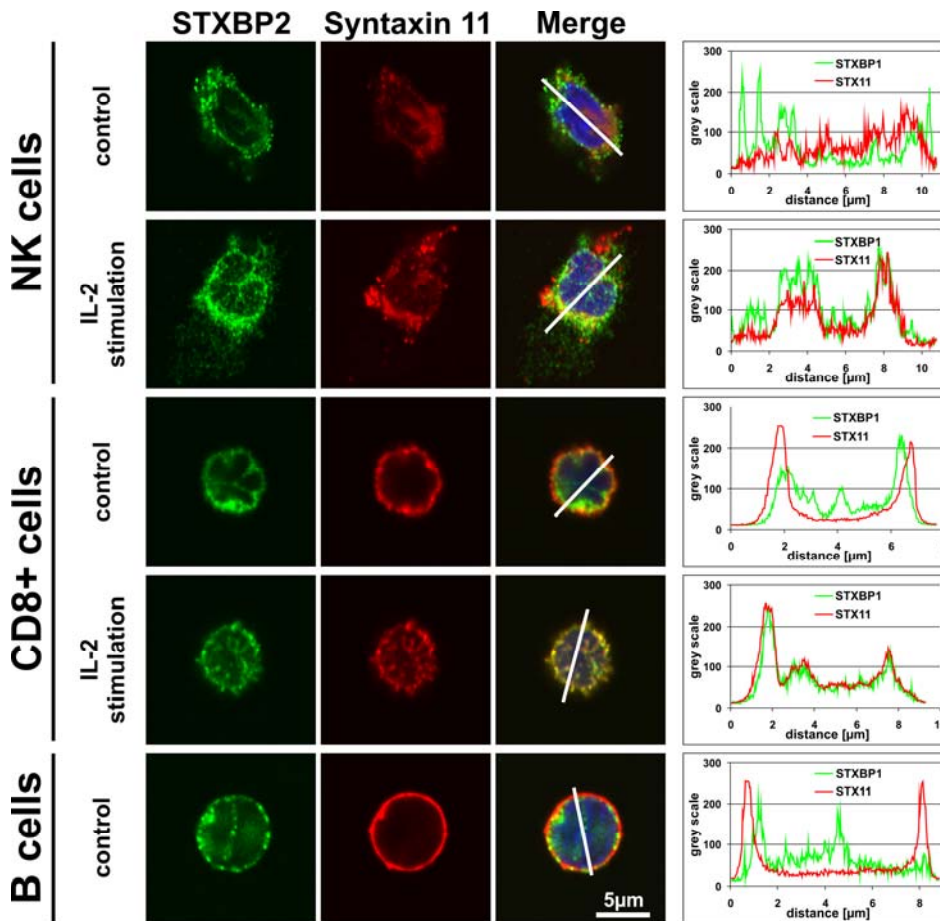

Primary CD8<sup>+</sup> T and NK cells showed a clear co-localization of STXBP2 and syntaxin 11, which was more pronounced in cells stimulated with IL-2, showing twice as many cells with a co-localization than without stimulation. There was a broader distribution of STXBP2 in B cells and a weaker co-localization with syntaxin 11.

**Table S1. PCR Primers Used for the Exon Amplification**

|              |                                |
|--------------|--------------------------------|
| Stxbp2_ex1F  | TCC ACG TGG GTG ACG CG         |
| Stxbp2_ex1R  | TGA AAC CCA GGA TCC CAG AG     |
| Stxbp2_ex2F  | ACT TTA GCC TAG GTG ACA GAG TG |
| Stxbp2_ex2R  | ACA TTC AGG GTC TTC CCC ATA G  |
| Stxbp2_ex3F  | AGC CAG CCC TTG AAA CTG C      |
| Stxbp2_ex3R  | TCC TAC ACT CAA GGG CTG AAC    |
| Stxbp2_ex4F  | AGT GGG TTT CTC CTG CAG TC     |
| Stxbp2_ex4R  | ATG TAC ACG CAT GCA CGC G      |
| Stxbp2_ex5F  | TTG CAC ATG GTG GCA GAT GG     |
| Stxbp2_ex5R  | ATC AGG CCA GAG CAG CCC        |
| Stxbp2_ex6F  | AGA GCC TAG GGT GTT GGT G      |
| Stxbp2_ex6R  | ACA GGT ATG AGC CAC TGC G      |
| Stxbp2_ex7F  | AGG TGT GCA CCT GCA GCG        |
| Stxbp2_ex7R  | AGA GGT TAA AGG TTA GGT GTT GC |
| Stxbp2_ex8F  | TGA CTC TCA CCT TCA AAC CCA T  |
| Stxbp2_ex8R  | AGG AAT GAG GCA CTG ACC CT     |
| Stxbp2_ex9F  | TTC AAG GCA GAC ACT CCC AG     |
| Stxbp2_ex9R  | ACT GGG GAA CCA GGT CAG T      |
| Stxbp2_ex10F | AGA GCA GGA CAC ATA CAG GTC    |
| Stxbp2_ex10R | AAG ACT TGG CAG CAG CCA G      |
| Stxbp2_ex11F | TGG GCT CAC CCA TGG CCT        |
| Stxbp2_ex11R | TCT CAG TCC AGG CTC GAA ATC    |
| Stxbp2_ex12F | TTC GAG CCT GGA CTG AGA C      |
| Stxbp2_ex12R | AGG CTG AGT CAA GGC AGA AC     |
| Stxbp2_ex13F | ATG CTC TGT CTG CGT TCT GC     |
| Stxbp2_ex13R | TCT CTA CAG TTC AGC CCC TC     |
| Stxbp2_ex14F | TGA GGT AGG ACC CAA ATG TCC    |
| Stxbp2_ex14R | TCA GCA GTT CCC AGG ATC GT     |
| Stxbp2_ex15F | TCT CTC ATC AGA GTC CTG GG     |
| Stxbp2_ex15R | AGG AAC CAC ACC GTG CCT G      |
| Stxbp2_ex16F | TAC CAG CCA CAC CAG GCG        |
| Stxbp2_ex16R | ATG CCA GCA ATG AGC ATT TTC C  |
| Stxbp2_ex17F | TGT CTG CCA GGA TCT TGG C      |
| Stxbp2_ex17R | TAA CAC AGA CCC AGG CGT G      |
| Stxbp2_ex18F | ACC TGT GGC CCT TCG TAT C      |
| Stxbp2_ex18R | ACT CTG GAG TCC AGA CAC C      |
| Stxbp2_ex19F | AGC CTG TCA AAG ACG AAG GC     |
| Stxbp2_ex19R | AGA AGG TGA GGT AGG CAC TG     |

**Table S2. Sequences of qPCR Primers Used**

| Description   | Forward primer         | Reverse primer         | Product |
|---------------|------------------------|------------------------|---------|
| <i>GAPDH</i>  | TGCACCACCAACTGCTTAGC   | GGCATGGACTGAGGTCATGAG  | 87 bp   |
| <i>ACTB</i>   | AGCCTCGCCTTTGCCGA      | CTGGTGCCTGGGGCG        | 174 bp  |
| <i>TFRC</i>   | GGATAAAGCGTTCTTGGTACCA | CCAGTAACCGGATGCTTCACA  | 105 bp  |
| 18S rRNA      | CATGCTAACTAGTTACGCGACC | CATCACAGACCTGTTATTGCTC | 106 bp  |
| <i>STXBP2</i> | CTTCCTGCTGCAAAATGTCA   | GCAAATAAATGGCCTCCAGA   | 105 bp  |
| <i>STX11</i>  | ACAGGTTTCCTTCTCCATCG   | TGCTGGTCATATTGCTTGGA   | 159 bp  |
